# Supplementary material
Source: Springer Nature journal article supplement (https://www.springermedizin.de/resource/supplementary/12968_2009_492_MOESM3_ESM.pdf/9579100)

**A**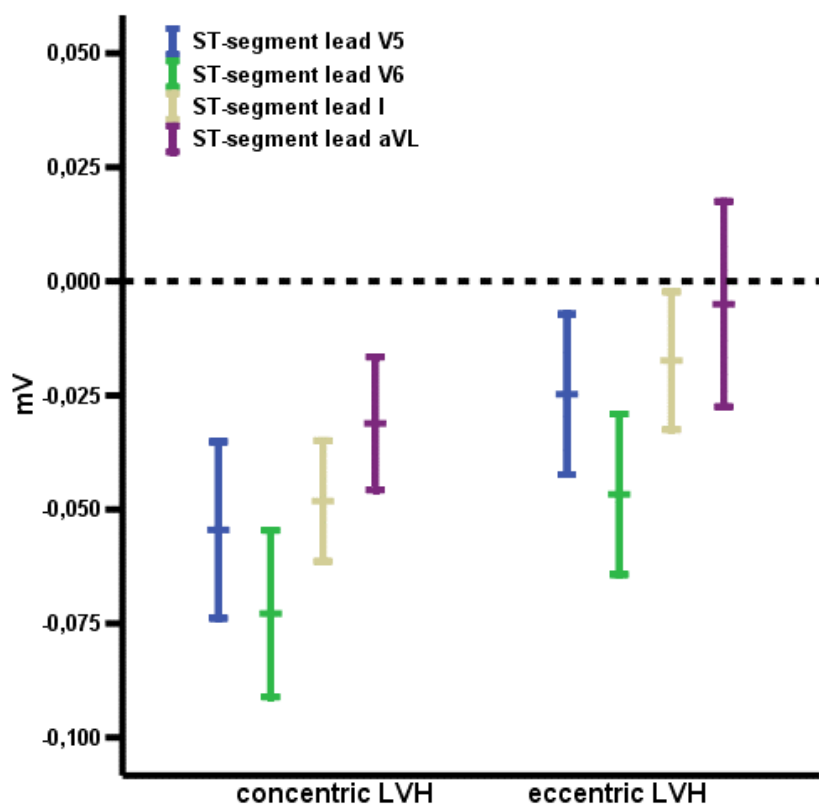**B**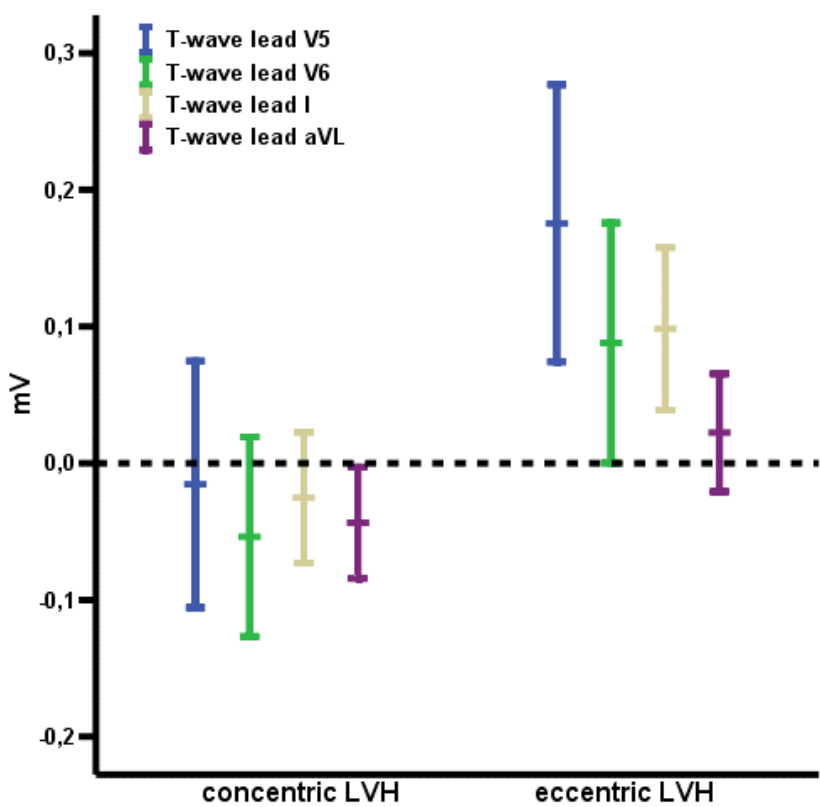

Supplement: MOESM3 [file 9579100]
